# Supplementary material
Source: ML conference proceedings conference paper supplement (https://openreview.net/forum?id=YHCU3GnmmW)
Supplement: supplementary_material [file attachment]

| Table 5. Interference/Cross Reactivity - Hemolysis           |                     |                     |                      |                     |                     |                      |                     |                     |                      |
|--------------------------------------------------------------|---------------------|---------------------|----------------------|---------------------|---------------------|----------------------|---------------------|---------------------|----------------------|
| Level of Hemolysis                                           | 5%                  |                     |                      | 10%                 |                     |                      | 15%                 |                     |                      |
|                                                              | NC pool<br>HEMPC 11 | Low ATA<br>HEMPC 22 | High ATA<br>HEMPC 33 | NC pool<br>HEMPC 44 | Low ATA<br>HEMPC 55 | High ATA<br>HEMPC 66 | NC pool<br>HEMPC 77 | Low ATA<br>HEMPC 88 | High ATA<br>HEMPC 99 |
| Run ID                                                       | ABC001              | ABC001              | ABC001               | ABC001              | ABC001              | ABC001               | ABC001              | ABC001              | ABC001               |
| 19ABCDEH2                                                    | 0.111               | 0.222               | 0.333                | 0.444               | 0.555               | 0.666                | 0.777               | 0.888               | 0.999                |
| Theoretical<br>Concentration<br>(ng/mL) %<br>Difference from | 0.00                | 50                  | 100                  | 0                   | 50                  | 100                  | 0                   | 50                  | 100                  |
| ABCDE 8                                                      | N/A                 | N/A                 | N/A                  | N/A                 | N/A                 | 1.0                  | N/A                 | N/A                 | 2.0                  |
| Result                                                       | Negative            | Positive            | Positive             | Negative            | Positive            | Positive             | Negative            | Positive            | Positive             |

↓

| Table 5. Interference/Cross Reactivity - Lipolysis           |                     |                     |                      |                     |                     |                      |                     |                     |                      |
|--------------------------------------------------------------|---------------------|---------------------|----------------------|---------------------|---------------------|----------------------|---------------------|---------------------|----------------------|
| Level of Lipolysis                                           | 5%                  |                     |                      | 10%                 |                     |                      | 15%                 |                     |                      |
|                                                              | NC pool<br>HEMPC 12 | Low ATA<br>HEMPC 23 | High ATA<br>HEMPC 34 | NC pool<br>HEMPC 45 | Low ATA<br>HEMPC 56 | High ATA<br>HEMPC 67 | NC pool<br>HEMPC 77 | Low ATA<br>HEMPC 88 | High ATA<br>HEMPC 99 |
| Run ID                                                       | ABC001              | ABC001              | ABC001               | ABC001              | ABC001              | ABC001               | ABC001              | ABC001              | ABC001               |
| ABCDEH192                                                    | 0.111               | 0.222               | 0.333                | 0.444               | 0.555               | 0.666                | 0.777               | 0.888               | 0.999                |
| Theoretical<br>Concentration<br>(ng/mL) %<br>Difference from | 0.00                | 50                  | 100                  | 0                   | 51                  | 100                  | 0                   | 50                  | 100                  |
| ABCDE 8                                                      | N/A                 | N/A                 | N/A                  | N/A                 | N/A                 | 1.0                  | N/A                 | N/A                 | 2.0                  |
| Result                                                       | Negative            | Positive            | Positive             | Negative            | Positive            | Positive             | Negative            | Positive            | Positive             |

Real Target:  
The effect of Hemolysis on the detection of ATA was evaluated in run 19ABCDEH2 by analyzing blanks (HEMPC 11, 22, and 33), low - level (HEMPC 44, 55, and 66 at 50 ng/mL).

Synthetic Target:  
The effect of Lipolysis on the detection of ATA was evaluated in run ABCDEH192 by analyzing blanks (HEMPC 12, 23, and 34), low - level (HEMPC 45, 56, and 67 at 51 ng/mL).

Figure 4: Example of synthetic values created from the original table for assay validation reports. In this example, “Hemolysis” is replaced by “Lipolysis”. The synthetic value “ABCDEH192” is created by randomising the original value “19ABCDEH2”. Numerical values such as “50” have been modified to new values “51” that are close to the original values.

| Sex | Group Set            | Subject ID | 1-7   | 1-8   |
|-----|----------------------|------------|-------|-------|
| F   | 1--Vehicle           | Mean       | -2.00 | -0.01 |
|     | 2--100mg/kg ABCD0001 | Mean       | -1.01 | -0.02 |
|     | 3--200mg/kg ABCD0001 | Mean       | -3.00 | -0.03 |
|     | 4--300mg/kg ABCD0001 | Mean       | -2.02 | -0.04 |
| M   | 1--Vehicle           | Mean       | 10.01 | 0.05  |
|     | 2--100mg/kg ABCD0001 | Mean       | 10.03 | 0.06  |
|     | 3--200mg/kg ABCD0001 | Mean       | 10.04 | 0.07  |
|     | 4--300mg/kg ABCD0001 | Mean       | 0.01  | -0.08 |

↓

| Sex | Group Set            | Subject ID | 1-7   | 1-8   |
|-----|----------------------|------------|-------|-------|
| M   | 1--Vehicle           | Mean       | -2.02 | -0.01 |
|     | 2--200mg/kg ABC0001D | Mean       | -1.01 | -0.02 |
|     | 3--300mg/kg ABC0001D | Mean       | -3.15 | -0.03 |
|     | 4--400mg/kg ABC0001D | Mean       | -2.02 | -0.04 |
| F   | 1--Vehicle           | Mean       | 10.05 | 0.05  |
|     | 2--300mg/kg ABC0001D | Mean       | 10.03 | 0.06  |
|     | 3--400mg/kg ABC0001D | Mean       | 10.04 | 0.07  |
|     | 4--500mg/kg ABC0001D | Mean       | 0.02  | -0.08 |

Real Target:  
Body weight change consisting of 1.00% loss compared to control in females at 200.0 mg/kg; Body weight change consisting of 10.00% loss compared to control in males at 300.0 mg/kg

Synthetic Target:  
Body weight change consisting of 1.13% loss compared to control in males at 300.0 mg/kg; Body weight change consisting of 10.03% loss compared to control in females at 500.0 mg/kg

Figure 5: Example of synthetic values created from the original table for toxicology reports (the findings of body weight changes). In this example, the original drug name “ABCD0001” has been modified to “ABC0001D”. Dosage levels such as “200mg/kg” are replaced by other values such as “300mg/kg”. The percentages of body weight changes are also replaced by randomising the original values slightly.
